# Supplementary material
Source: PubMed Central journal article supplement (PMC2856158)
Supplement: mmc1.pdf [file mmc1.pdf]

Biophysical Journal, Volume 98

**Supporting Material**

**Folding intermediate and folding nucleus for I-N and U-I-N transitions in apomyoglobin: contributions by conserved and non-conserved residues**

Ekaterina N. Samatova, Bogdan S. Melnik, Vitaly A. Balobanov, Natalya S. Katina, Dmitry A. Dolgikh, Gennady V. Semisotnov, Alexei V. Finkelstein, and Valentina E. Bychkova

## SUPPORTING MATERIALS

The complete set of experimental data for equilibrium urea-induced denaturing transitions of apomyoglobin and its mutants is presented in Fig. 1S.

The complete set of experimental data for kinetics of de- and renaturation transitions of apomyoglobin mutants is presented in Fig. 2S.

### Direct fitting the chevron plots.

Chevron plot parameters obtained by the commonly used (traditional, “established”) procedures for three-state chevron plots [1-3] and by our analytical approach [4] coincide with experimental chevron plots having a more or less complete refolding limb. In the opposite case, the commonly used procedures (based solely on chevron plots) are not applicable, while our approach allows describing the folding process. The advantage of the latter approach is that we use experimentally determined parameter  $f_i(M)$  (urea concentration-dependent fraction of the intermediate state), obtained from the burst phase fluorescence amplitude. That is, we use an additional source of experimental information. As we reported in 2005 [4], this approach allowed calculating energetic parameters of the folding/unfolding reaction even from incomplete plots for the I-N transition.

As an example, we give below some calculations based solely on chevron plots and neglecting an information that can be extracted from the burst phase fluorescence amplitude. These calculations are presented for the WT and I28A apoMb, where the experimentally obtained  $\ln(k_{\text{obs}}([M]))$  plots show refolding limbs, as well as for the mutants F33A and L61A, showing chevron plots with incomplete refolding limbs. For the calculations, we used the following equation:

$$\ln(k_{\text{obs}}([M])) = \ln \left[ \frac{k_{\text{IN}}^{\text{water}} \cdot \exp(m_{\text{IN}} \cdot [M])}{1 + \exp((C_{1/2} - [M])/m_{\text{UI}})} + k_{\text{NI}}^{\text{water}} \cdot \exp(m_{\text{NI}} \cdot [M]) \right] \quad (1S)$$

This equation is analogous to those used in the papers [1-3], and it is based on the equation  $k_{\text{obs}} = k_{\text{NI}} + f_i \cdot k_{\text{IN}}$  presented in [5, 6]. Here,  $k_{\text{NI}}$ ,  $k_{\text{IN}}$ , and  $f_i$  are determined as

$$k_{\text{NI}}([M]) = k_{\text{NI}}^{\text{water}} \cdot \exp(m_{\text{NI}} \cdot [M]), \quad (2S)$$

$$k_{\text{IN}}([M]) = k_{\text{IN}}^{\text{water}} \cdot \exp(m_{\text{IN}} \cdot [M]), \quad (3S)$$

$$f_1([M]) = \frac{I}{1 + \exp((C_{1/2} - [M])/m_{UI})}. \quad (4S)$$

Automatically calculated parameters values and their errors are shown in the following Table:

|                             |                   |                             |                   |
|-----------------------------|-------------------|-----------------------------|-------------------|
| WT                          |                   | I28A                        |                   |
| $\ln k_{NI}^{\text{water}}$ | $=2.73 \pm 0.08$  | $\ln k_{NI}^{\text{water}}$ | $=1.94 \pm 0.07$  |
| $m_{NI}$                    | $=-0.38 \pm 0.09$ | $m_{NI}$                    | $=-0.2 \pm 0.1$   |
| $\ln k_{NI}^{\text{water}}$ | $=-1.58 \pm 0.09$ | $\ln k_{NI}^{\text{water}}$ | $=-1.4 \pm 0.1$   |
| $m_{IN}$                    | $=0.68 \pm 0.02$  | $m_{IN}$                    | $=0.80 \pm 0.03$  |
| $C_{1/2}$                   | $=2.21 \pm 0.09$  | $C_{1/2}$                   | $=1.9 \pm 0.1$    |
| $m_{UI}$                    | $=-0.33 \pm 0.03$ | $m_{UI}$                    | $=-0.36 \pm 0.04$ |
| F33A                        |                   | L61A                        |                   |
| $\ln k_{NI}^{\text{water}}$ | $=2.4 \pm 0.3$    | $\ln k_{NI}^{\text{water}}$ | $=1.5 \pm 0.4$    |
| $m_{NI}$                    | $=0.0 \pm 0.7$    | $m_{NI}$                    | $=0 \pm 1$        |
| $\ln k_{NI}^{\text{water}}$ | $=0 \pm 9$        | $\ln k_{NI}^{\text{water}}$ | $=0 \pm 3$        |
| $m_{IN}$                    | $=1 \pm 3$        | $m_{IN}$                    | $=1 \pm 1$        |
| $C_{1/2}$                   | $=3 \pm 3$        | $C_{1/2}$                   | $=2 \pm 1$        |
| $m_{UI}$                    | $=-0.5 \pm 0.5$   | $m_{UI}$                    | $=-0.3 \pm 0.5$   |

As seen, the errors (specifically, for  $\ln k_{NI}^{\text{water}}$  and  $C_{1/2}$ ) are within the admissible limits for WT and I28A apoMb, but for F33A and L61A the errors are too high, while the chevron plots are well described by fitting of the used equations (the best fit of which is shown as continuous lines in all panels of Fig. 3S). Yet, the approach that uses additional information extracted from the burst phase fluorescence amplitude [4] gives much smaller errors, see Table 1 in the main text. This is why we used the approach [4] that has been developed in our laboratory and published in 2005 to describe a three-state kinetic process.

### Supplementary REFERENCES

1. Matouschek A., L. Serrano, and A.R. Fersht. 1992. The folding of an enzyme. IV. Structure of an intermediate in the refolding of barnase analysed by a protein engineering procedure. *J. Mol. Biol.* 224:819-835.

2. Parker M.J., M. Lorch, R.B. Sessions, and A.R. Clarke. 1998. Thermodynamic properties of transient intermediates and transition states in the folding of two contrasting protein structure. *Biochemistry*. 37:2538-2545.
3. Ferguson N., A.P. Capaldi, R. James, C. Kleanthous, and S.E. Radford. 1999. Rapid folding with and without populated intermediates in the homologous four-helix proteins Im7 and Im9.
4. Baryshnikova, E.N., B.S. Melnik, A.V. Finkelstein, G.V. Semisotnov, and V.E. Bychkova. 2005. Three-state protein folding: experimental determination of free-energy profile. *Protein Sci*. 14:2658-2667.
5. Parker, M.J., J. Spencer, and A.R. Clarke. 1995. An integrated kinetic analysis of intermediates and transition states in protein folding reactions. *J. Mol. Biol.* 253:771-786.
6. Baldwin, R.L. 1996. On-pathway versus off-pathway folding intermediates. *Fold. Des.* 1:R1-R8.

## Supplementary FIGURES LEGENDS

**Supplementary FIGURE 1S.** Equilibrium urea-induced unfolding of WT apomyoglobin and some of its mutant forms at pH 6.2: (a, c, e, d), as detected by molar ellipticity at 222 nm ( $[\theta]_{222}$ ); (b, d, f, h), as detected by changing intensity of tryptophan fluorescence at 335 nm ( $I_{335}$ ). Continuous lines in panels c, e, d are the same best-fitted 3-state WT line shown in panel a, and continuous lines in panels d, f, h are the same best-fitted 3-state WT line shown in panel b.

**Supplementary FIGURE 2S.** Upper panels: observed folding/unfolding rate constant ( $k_{\text{obs}}$ ) versus the final urea concentration M for apomyoglobin mutants. All rate constants are measured in  $\text{sec}^{-1}$  and given in a logarithmic scale. The left part of each chevron corresponds to folding experiments (non-filled symbols), the right part — to unfolding experiments (dark blue filled symbols). Grey symbols show the folding rate constants  $k_{\text{IN}}([M])$  for the I $\rightarrow$ N transition; these are calculated from Eq. 2 using the corresponding  $k_{\text{obs}}([M])$ , extrapolations of unfolding rates  $k_{\text{NI}}([M]) = k_{\text{NU}}([M])$ , and  $f_{\text{I}}([M])$  plots shown for each protein in the lower panel. The  $k_{\text{NI}}([M])$  values were calculated from the folding data in the region where the  $f_{\text{I}}([M]) > 0.1$ . Linear approximations of  $\ln(k_{\text{NI}}([M]))$  are marked by dark blue dashed line, and those of  $\ln(k_{\text{IN}}([M]))$  by dark blue dash-dot lines. Light blue lines represent calculated

chevron plots using an equation  $k_{\text{obs}} = k_{\text{NI}} + f_{\text{I}} \cdot k_{\text{IN}}$ . Continuous black lines in the upper panels represent chevron plots for the WT protein (see Fig. 3, WT panel). Light blue lines in the lower panels correspond to two-state fitting of  $f_{\text{I}}$  vs urea concentration. Continuous black lines in the lower panels represent  $f_{\text{I}}$  plots for WT protein (see Fig. 3, WT panel).

**Supplementary FIGURE 3S.** Best-fitted approximation of experimental data by equations (1) - (4). Comparison with the corresponding panels of Fig. 3 and Fig. 3S shows that this "best fit" (red lines) is, actually, not better than that obtained by our analytical approach (see Fig. 3 and Fig. 2S), though the latter leads to smaller errors in the chevron plot parameters.

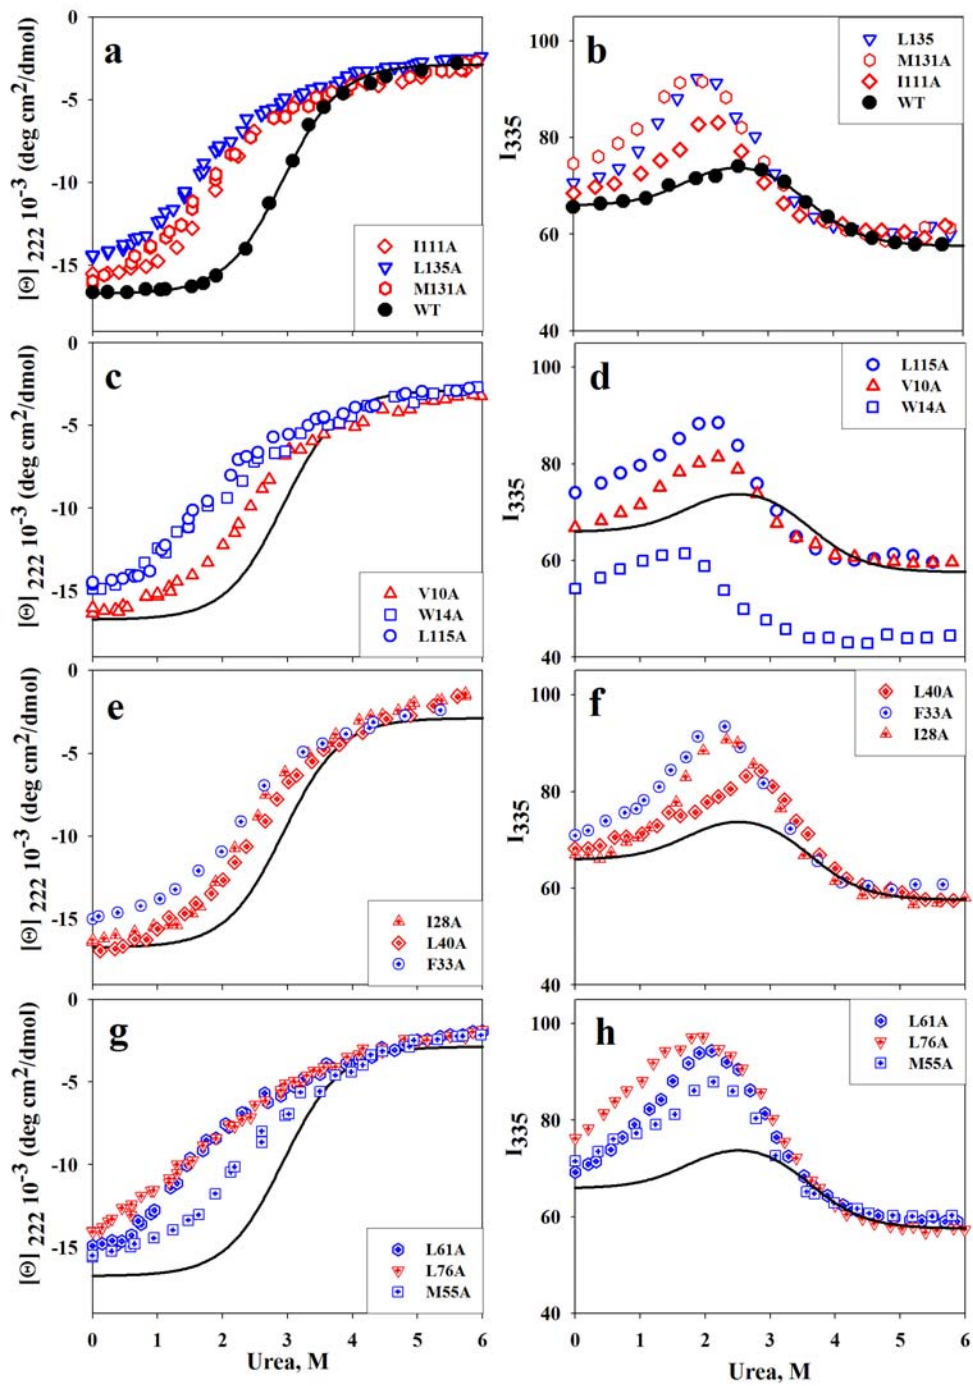

FIGURE 1S

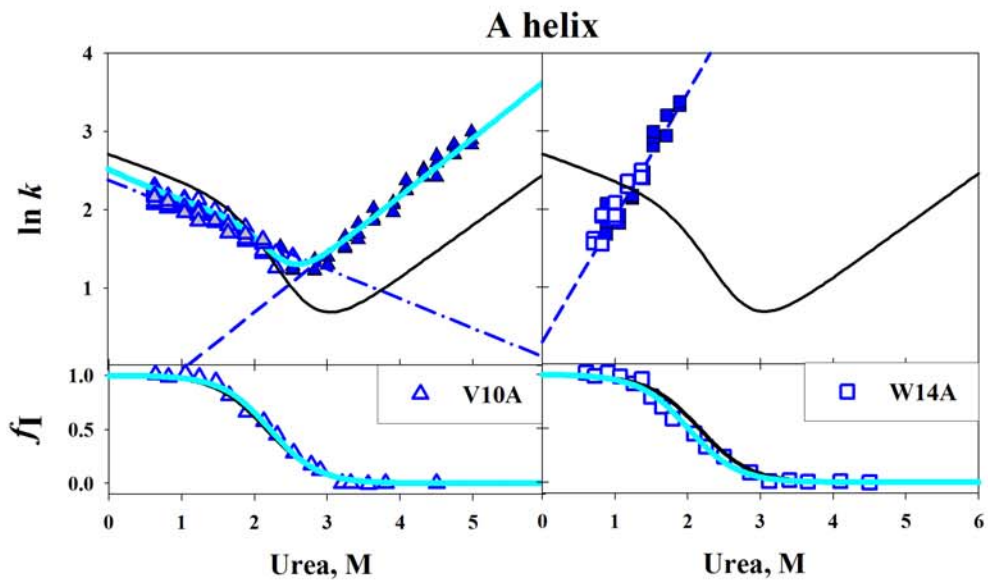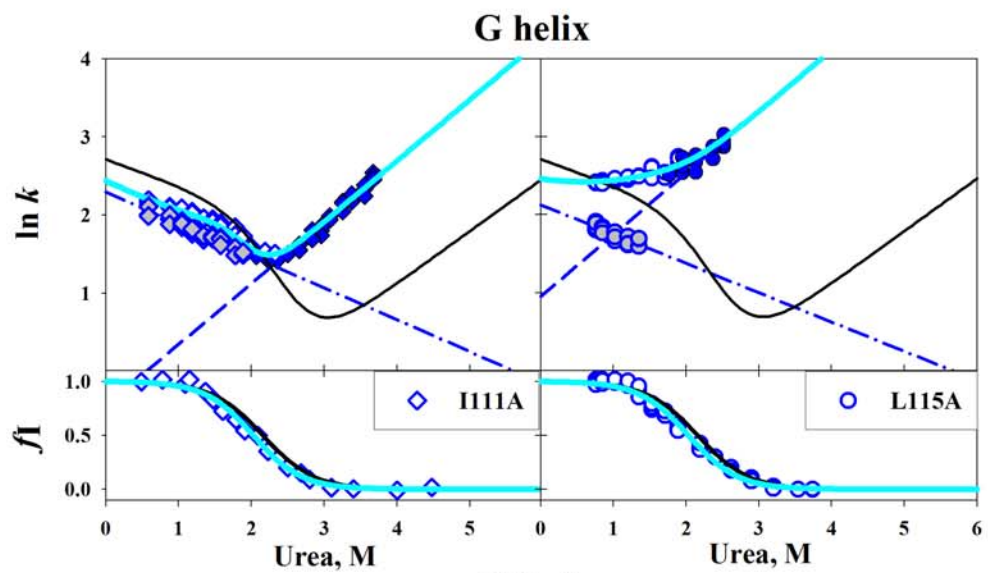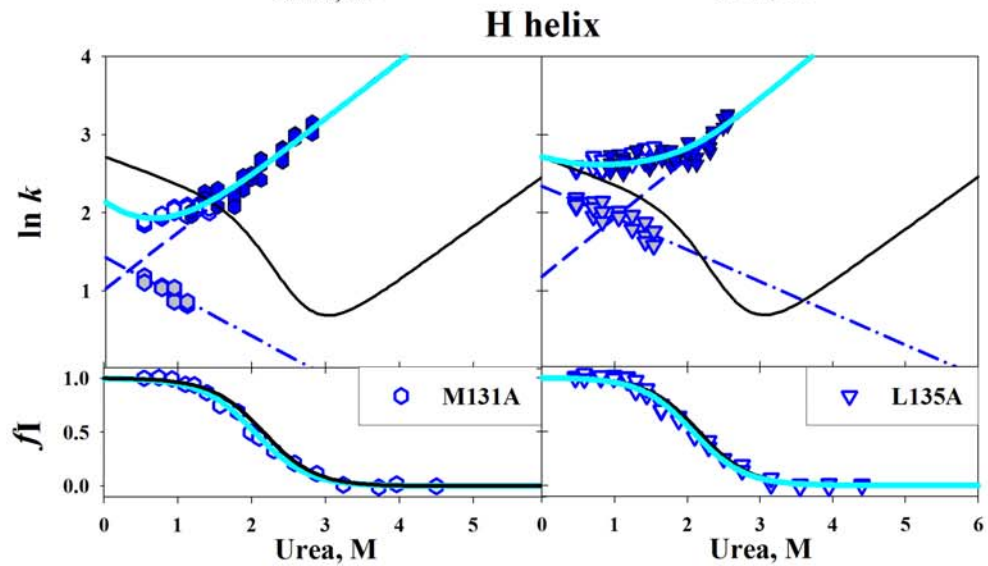

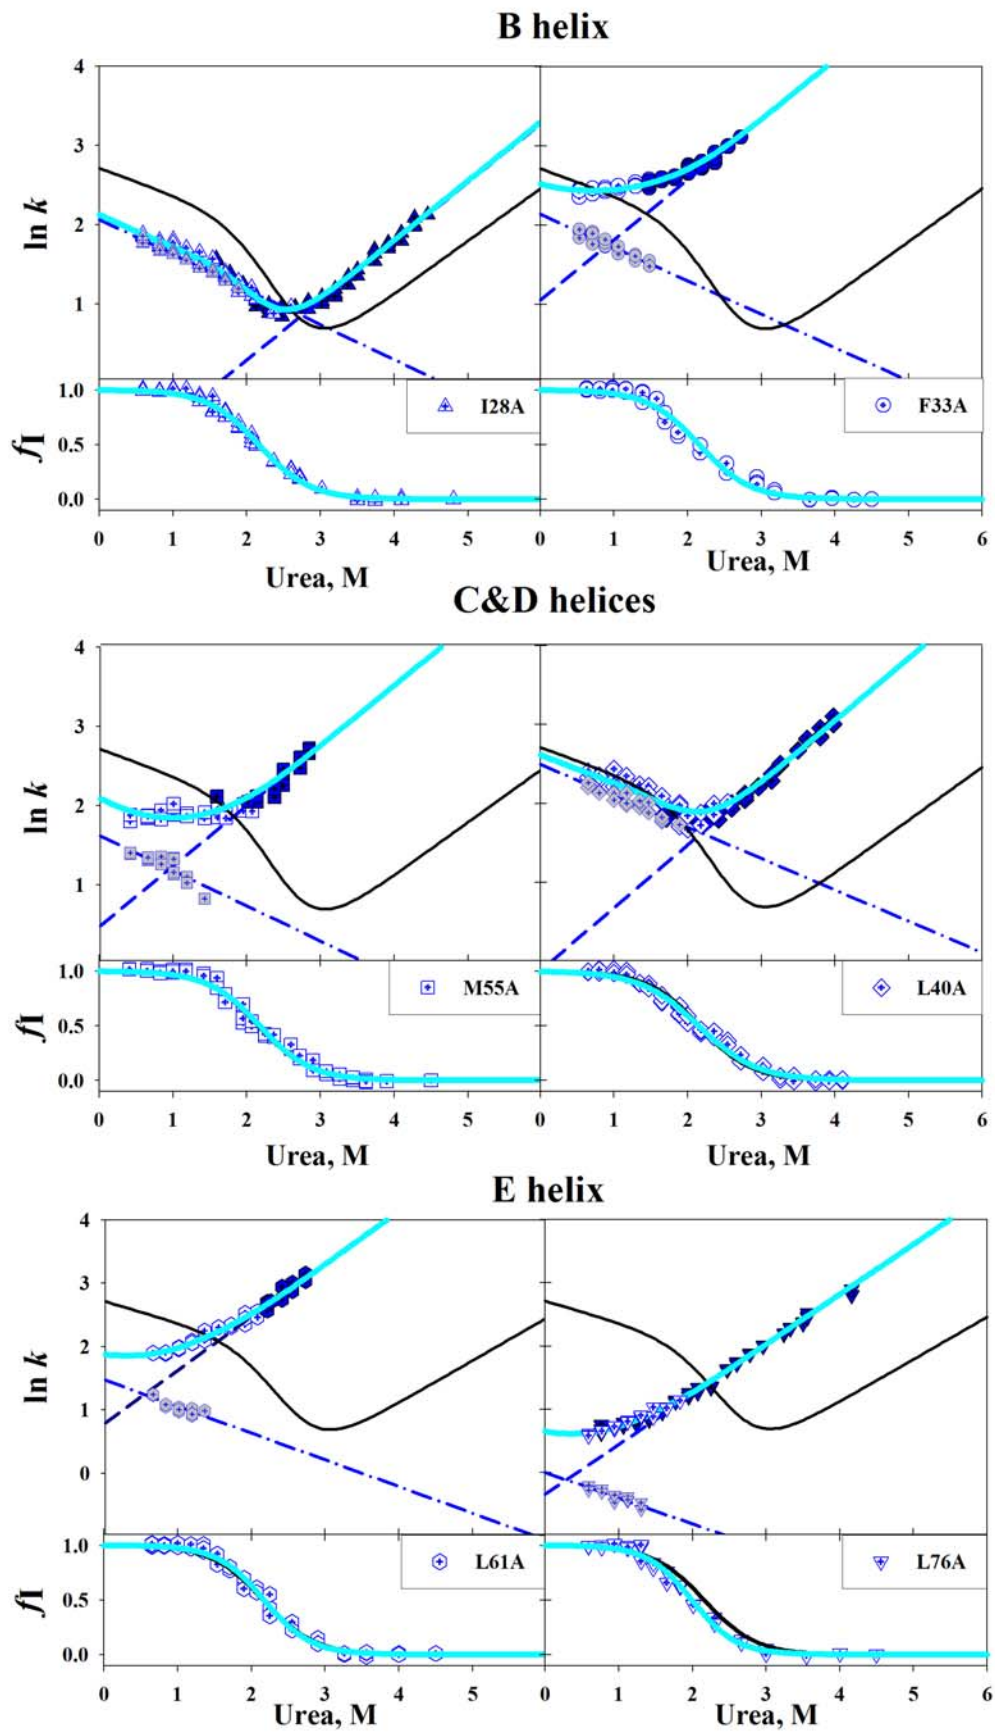

FIGURE 2S



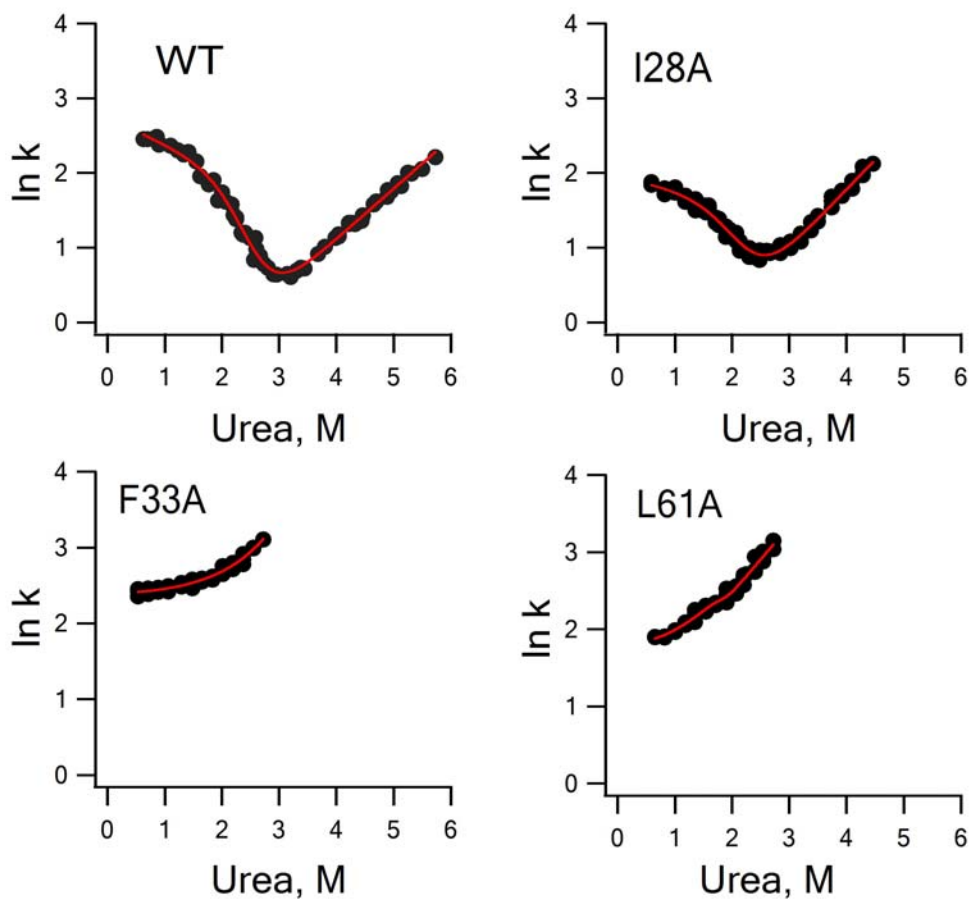

**FIGURE 3S**
